# Supplementary material
Source: Springer Nature journal article supplement (https://www.springermedizin.de/resource/supplementary/12885_2010_2591_MOESM3_ESM.pdf/9462628)

**A**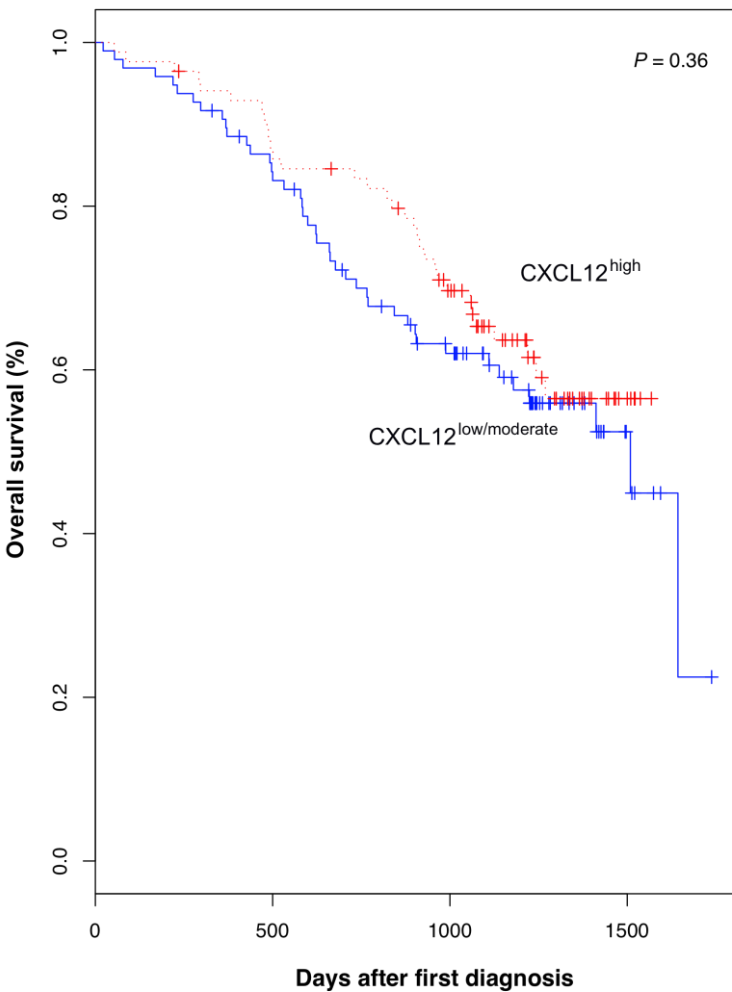**B**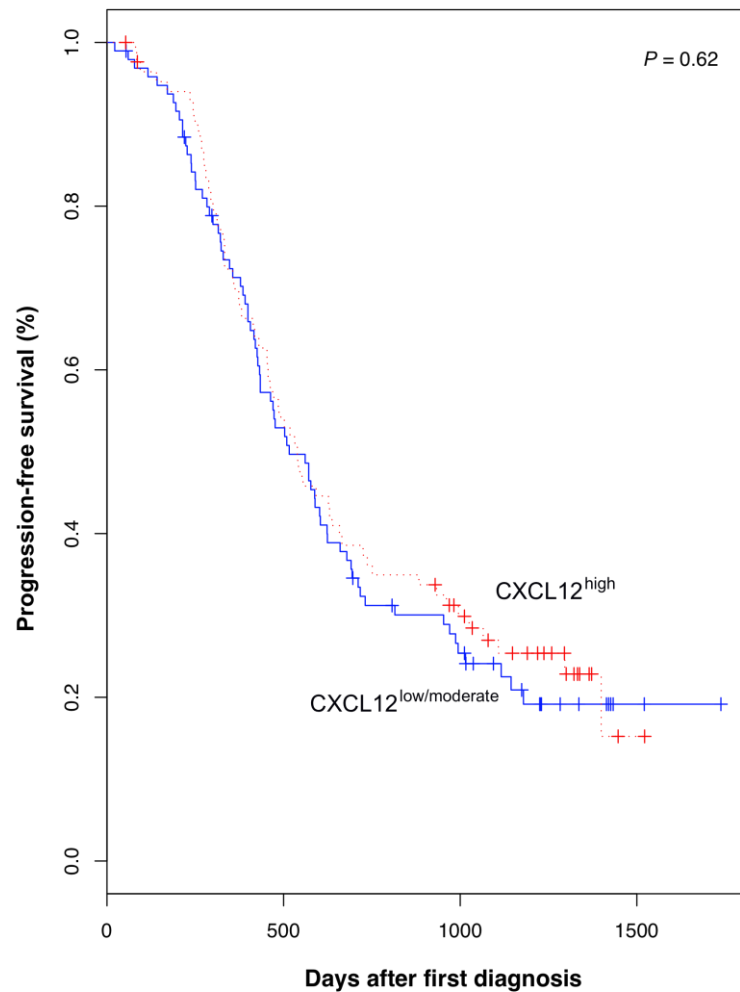

Supplement: MOESM3 [file 9462628]
